# Supplementary material for: A family of mammalian Na+-dependent L-ascorbic acid transporters
Source: Springer Nature journal article supplement (doi:10.1038/19986), 1999-05-01
Supplement: 41586_1999_BF19986_MOESM2_ESM.pdf [file 41586_1999_BF19986_MOESM2_ESM.pdf]

**A family of mammalian Na<sup>+</sup>-dependent L-ascorbic acid transporters**

Hiroyasu Tsukaguchi, Taro Tokui, Bryan Mackenzie, Urs V. Berger, Xing-Zhen Chen, Yangxi Wang, Richard F. Brubaker & Matthias A. Hediger

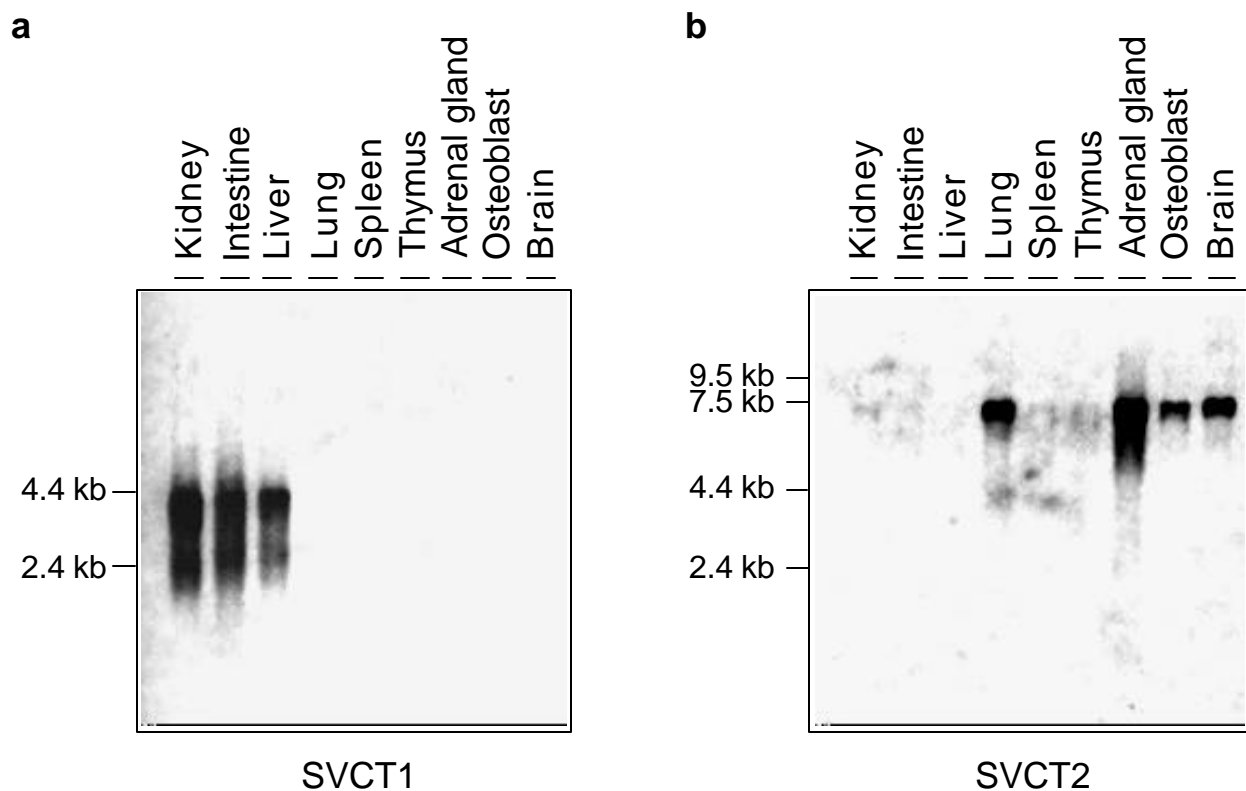

**Figure 5** High stringency Northern blot analysis of the tissue distribution of SVCT1 and SVCT2 RNA. We isolated 3  $\mu\text{g}$  of poly(A)<sup>+</sup> RNA from several rat tissues and from the MC3T3-E1 murine osteoblast cell line<sup>4</sup> and hybridized RNA with [<sup>32</sup>P]-dCTP labelled probes from SVCT1 (**a**) and SVCT2 (**b**). Intestinal poly(A)<sup>+</sup> RNA was isolated from mucosal scrapes of the proximal 20-30 cm of small intestine.
