# Supplementary material for: A family of mammalian Na+-dependent L-ascorbic acid transporters
Source: Springer Nature journal article supplement (doi:10.1038/19986), 1999-05-01
Supplement: 41586_1999_BF19986_MOESM3_ESM.pdf [file 41586_1999_BF19986_MOESM3_ESM.pdf]

**A family of mammalian Na<sup>+</sup>-dependent L-ascorbic acid transporters**

Hiroyasu Tsukaguchi, Taro Tokui, Bryan Mackenzie, Urs V. Berger, Xing-Zhen Chen, Yangxi Wang, Richard F. Brubaker & Matthias A. Hediger

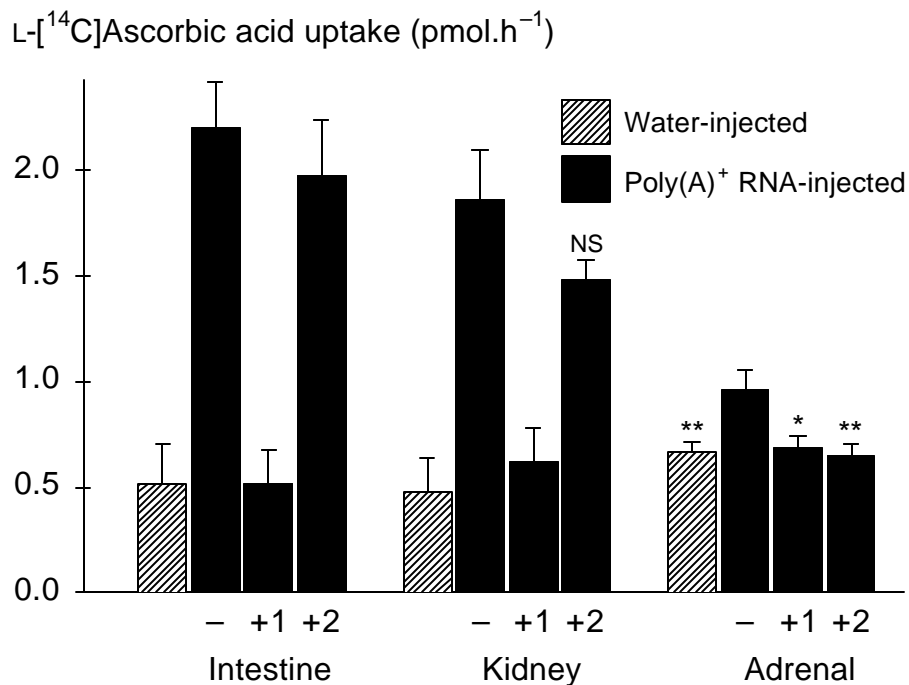

**Figure 6** Hybrid depletion of rat SVCT1 and SVCT2 expression in RNA-injected oocytes. L-[<sup>14</sup>C]Ascorbic acid uptake in oocytes injected with poly(A)<sup>+</sup> RNA from rat intestine (125 μM L-ascorbic acid), kidney (390 μM) or adrenal gland (390 μM), without hybridization (-), or following hybridization with antisense oligonucleotides for rat SVCT1 (+1) or SVCT2 (+2). Data are mean ± SEM (*n* = 6-16); NS, not significant, \* *P* < 0.05, \*\* *P* < 0.02, when compared with uptake in poly(A)<sup>+</sup> RNA-injected oocytes (without hybridization).
