# Supplementary material for: A family of mammalian Na+-dependent L-ascorbic acid transporters
Source: Springer Nature journal article supplement (doi:10.1038/19986), 1999-05-01
Supplement: 41586_1999_BF19986_MOESM4_ESM.pdf [file 41586_1999_BF19986_MOESM4_ESM.pdf]

Supplementary information relating to Nature, Vol. 399, pages 70-75, May 6, 1999

**A family of mammalian Na<sup>+</sup>-dependent L-ascorbic acid transporters**

Hiroyasu Tsukaguchi, Taro Tokui, Bryan Mackenzie, Urs V. Berger, Xing-Zhen Chen, Yangxi Wang, Richard F. Brubaker & Matthias A. Hediger

**Table 1** Summary of saturation kinetics for SVCT1 and SVCT2 determined from radiotracer assays

| SVCT isoform | L-Ascorbic acid               |                              | Na <sup>+</sup>        |                              |
|--------------|-------------------------------|------------------------------|------------------------|------------------------------|
|              | $K_{0.5}^{Asc}$<br>( $\mu$ M) | $n_H$ for<br>L-ascorbic acid | $K_{0.5}^{Na}$<br>(mM) | $n_H$ for<br>Na <sup>+</sup> |
| SVCT1        | 18.7 $\pm$ 2.7                | 1.2 $\pm$ 0.1                | 26.8 $\pm$ 3.8         | 1.6 $\pm$ 0.3                |
| SVCT2        | 9.4 $\pm$ 1.9                 | 1.0 $\pm$ 0.3                | 10.4 $\pm$ 0.6         | 2.0 $\pm$ 0.2                |

Kinetic parameters were determined from 500  $\mu$ M L-[<sup>14</sup>C]ascorbic acid uptake data over a range of Na<sup>+</sup> concentrations, and over a range of L-ascorbic acid concentrations at 100 mM NaCl (with 6-10 oocytes at each concentration). Data are from single representative experiments and errors represent the error in the estimate of kinetic parameters according to equation 1. The derived maximal velocity ( $V_{max}$ ) for L-ascorbic acid uptake ( $V_{max}^{Asc}$ ) was 3.5  $\pm$  0.1 pmol.min<sup>-1</sup> per oocyte in the case of SVCT1;  $V_{max}^{Asc}$  was 0.2  $\pm$  0.01 pmol.min<sup>-1</sup> per oocyte for SVCT2.
